# Supplementary material for: Adaptive reduction of male gamete number in the selfing plant Arabidopsis thaliana
Source: PubMed Central journal article supplement (PMC7280297; doi:10.1038/s41467-020-16679-7), 2020-06-08
Supplement: 41467_2020_16679_MOESM3_ESM.pdf [file 41467_2020_16679_MOESM3_ESM.pdf]

## Description of Additional Supplementary Files

File name: Supplementary Data 1

Description: *Arabidopsis thaliana* accessions used in this study
